# Supplementary material
Source: PubMed Central journal article supplement (PMC5610090)
Supplement: NIHMS895853-supplement-supplement_1.pdf [file NIHMS895853-supplement-supplement_1.pdf]

## SUPPLEMENTARY MATERIAL

### **Table of Contents**

Table S1. Bias parameters assumed for trapezoidal distributions used to inform probabilistic bias analysis.

Table S2. Results of probabilistic bias analysis: stillbirth odds ratios and 95% simulation intervals.

Figure S1. Directed acyclic graph depicting potential relationships between childhood maltreatment and stillbirth.

Table S1. Bias parameters assumed for trapezoidal distributions used to inform probabilistic bias analysis.

|                          | Minimum | Lower Mode | Upper Mode | Maximum |
|--------------------------|---------|------------|------------|---------|
| Sensitivity, stillbirths | 0.60    | 0.80       | 0.90       | 1.00    |
| Sensitivity, live births | 0.60    | 0.70       | 0.80       | 1.00    |
| Specificity, stillbirths | 0.95    | 0.97       | 0.98       | 1.00    |
| Specificity, live births | 0.95    | 0.97       | 0.98       | 1.00    |

Table S2. Results of probabilistic bias analysis: stillbirth odds ratios and 95% simulation intervals.

|                          | Total Population |            | Non-Hispanic White Women |            | Non-Hispanic Black Women |            | Hispanic Women |            |
|--------------------------|------------------|------------|--------------------------|------------|--------------------------|------------|----------------|------------|
|                          | OR               | 95% SI     | OR                       | 95% SI     | OR                       | 95% SI     | OR             | 95% SI     |
| <b>Overall CM</b>        |                  |            |                          |            |                          |            |                |            |
| None                     | 1.00             | Referent   | 1.00                     | Referent   | 1.00                     | Referent   | 1.00           | Referent   |
| Any                      | 0.95             | 0.57, 1.90 | 0.93                     | 0.67, 1.46 | 0.52                     | 0.00, 3.14 | 0.72           | 0.25, 1.92 |
| <b>Emotional Abuse</b>   |                  |            |                          |            |                          |            |                |            |
| None or Minimal          | 1.00             | Referent   | 1.00                     | Referent   | 1.00                     | Referent   | 1.00           | Referent   |
| Low to Extreme           | 0.74             | 0.58, 1.05 | 1.42                     | 1.11, 1.95 | 0.18                     | 0.13, 0.28 | 0.46           | 0.36, 0.67 |
| <b>Emotional Neglect</b> |                  |            |                          |            |                          |            |                |            |
| None or Minimal          | 1.00             | Referent   | 1.00                     | Referent   | 1.00                     | Referent   | 1.00           | Referent   |
| Low to Extreme           | 2.01             | 1.53, 2.86 | 1.66                     | 1.31, 2.24 | 2.79                     | 2.02, 4.57 | 1.86           | 1.37, 2.81 |
| <b>Physical Abuse</b>    |                  |            |                          |            |                          |            |                |            |
| None or Minimal          | 1.00             | Referent   | 1.00                     | Referent   | 1.00                     | Referent   | 1.00           | Referent   |
| Low to Extreme           | 0.91             | 0.73, 1.22 | 1.17                     | 0.92, 1.56 | 1.27                     | 0.92, 1.95 | 0.34           | 0.27, 0.48 |
| <b>Physical Neglect</b>  |                  |            |                          |            |                          |            |                |            |
| None or Minimal          | 1.00             | Referent   | 1.00                     | Referent   | 1.00                     | Referent   | 1.00           | Referent   |
| Low to Extreme           | 1.57             | 1.24, 2.13 | 2.21                     | 1.70, 2.97 | 1.51                     | 1.19, 2.02 | 1.10           | 0.85, 1.56 |
| <b>Sexual Abuse</b>      |                  |            |                          |            |                          |            |                |            |
| None or Minimal          | 1.00             | Referent   | 1.00                     | Referent   | 1.00                     | Referent   | 1.00           | Referent   |
| Low to Extreme           | 0.72             | 0.57, 0.98 | 1.43                     | 1.13, 1.91 | 0.64                     | 0.47, 1.00 | 0.44           | 0.34, 0.62 |

Abbreviations: OR, odds ratio; SI, simulation interval; CM, childhood maltreatment

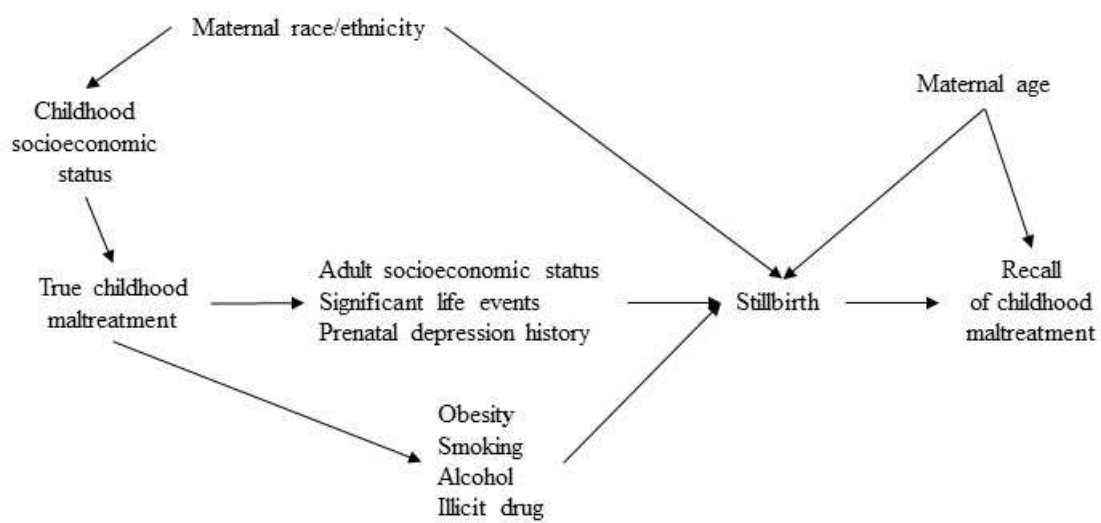

Figure S1.
